1                   **Assessment of Standard HIV Testing Services Delivery to Injured Persons Seeking**  
2                   **Emergency Care in Nairobi, Kenya: A Prospective Observational Study**

3  
4 Adam R. Aluisio<sup>1\*</sup>, Janet Sugut<sup>2</sup>, John Kinuthia<sup>3</sup>, Rose Bosire<sup>4</sup>, Eric Ochola<sup>3</sup>, Beatrice Ngila<sup>3</sup>,  
5 Daniel K. Ojuka<sup>5</sup>, J. Austin Lee<sup>1</sup>, Alice Maingi<sup>6</sup>, Kate M. Guthrie<sup>7</sup>, Tao Liu<sup>8</sup>, Mary Mugambi<sup>9</sup>,  
6 David A. Katz<sup>10</sup>, Carey Farquhar<sup>10,11,12</sup>, Michael J. Mello<sup>1</sup>

7  
8 <sup>1</sup>Department of Emergency Medicine, Alpert Medical School of Brown University, Providence,  
9 USA; <sup>2</sup>Department of Accident and Emergency, Kenyatta National Hospital, Nairobi, Kenya;  
10 <sup>3</sup>Department of Research & Programs, Kenyatta National Hospital, Nairobi, Kenya; <sup>4</sup>Center for  
11 Public Health Research, Kenya Medical Research Institute, Nairobi, Kenya; <sup>5</sup>Department of  
12 Surgery, University of Nairobi Faculty of Health Sciences, Nairobi, Kenya; <sup>6</sup>Department of  
13 Dermatology, Kenyatta National Hospital, Nairobi, Kenya; <sup>7</sup>Department of Psychiatry and  
14 Human Behavior, Alpert Medical School, Brown University, Providence, RI, USA; <sup>8</sup>Department  
15 of Biostatistics, Center for Statistical Sciences, Brown University School of Public Health,  
16 Providence, Rhode Island; <sup>9</sup>Ministry of Health, Nairobi, Kenya; <sup>10</sup>Department of Global Health,  
17 University of Washington, Seattle, US; <sup>11</sup>Department Epidemiology and <sup>12</sup>Medicine, University  
18 of Washington, Seattle, USA.

19  
20 **Corresponding author:**

21 \*Adam R. Aluisio, MD, MSc, DTM&H  
22 Department of Emergency Medicine, Alpert Medical School of Brown University  
23 55 Claverick Street, Room 274  
24 Providence, RI 02903  
25 E-mail: adam\_aluisio@brown.edu  
26 Telephone: +1(401) 444-5826

27  
28 **Short title: Standard HIV Testing During Emergency Care in Kenya**

29  
30 **Competing interests and sources of funding:** None of the authors have any conflicts of interest.  
31 The contents of this manuscript are solely the responsibility of the authors and do not necessarily  
32 represent the official views of affiliated institutions or funding bodies. The work was supported by  
33 the National Institute of Allergy and Infectious Diseases at the National Institutes of Health (grant  
34 number: K23AI145411).

35  
36 **Author Contributions:** ARA, JK, RB, AM, KMG, TL, MM, DAK, CF and MJM designed the  
37 study. ARA, JS, JK, RB, EO, BN, DKO, JAL and AM executed the research activities. ARA, EO,  
38 BN, TL, MM, DAK, CF and MJM were responsible for statistical analyses. ARA, JS, JK, RB, EO,  
39 BN, DKO, JAL, AM, KMG, TL, MM, DAK, CF and MJM drafted and revised the manuscript and  
40 approved the final presentation.

41  
42 **Keywords:** HIV epidemiology, Key and vulnerable populations, Testing, Health systems,  
43 Emergency Care, Kenya

45 **Abstract**

46 Emergency departments (EDs) in Africa are contact points for key groups for HIV testing services  
47 (HTS) but understanding of ED-testing delivery is limited which may impeded program impacts.  
48 This study evaluated the offering and uptake of standard HTS among injured persons seeking ED  
49 care at Kenyatta National Hospital (KNH) in Nairobi, Kenya.  
50 An ED population of adult injured persons was prospectively enrolled (1 March - 25 May 2021)  
51 and followed through ED disposition. Participants requiring admission were followed through  
52 hospital discharge and willing participants were contacted at 28-days for follow up. Data on  
53 population characteristics and HTS were collected by personnel distinct from clinicians  
54 responsible for standard HTS. Descriptive analyses were performed and prevalence values with  
55 95% confidence intervals (CI) were calculated for HIV parameters.  
56 The study enrolled 646 participants. The median age was 29 years with the majority male (87.8%).  
57 Most ED patients were discharged (58.9%). A prior HIV diagnosis was reported by 2.3% of  
58 participants and 52.7% reported their last testing as >6 months prior. Standard ED-HTS were  
59 offered to 49 or 8.6% of participants (95% CI: 5.8-9.9%), among which 89.8% accepted. For ED-  
60 tested participants 11.4% were newly diagnosed with HIV (95% CI: 5.0-24.0%). Among 243  
61 participants admitted, testing was offered to 6.2% (95% CI: 3.9-9.9%), with 93.8% accepting. For  
62 admitted participants tested 13.3% (95% CI: 4.0-35.1%) were newly diagnosed (all distinct from  
63 ED cases). At 28-day follow up an additional 22 participants reported completing testing since ED  
64 visitation, with three newly diagnosed. During the full follow-up period the HIV prevalence in the  
65 population tested was 10.3% (95% CI: 5.3-19.0%); all being previously undiagnosed.

66 Offering of standard HTS was infrequent, however, when offered, uptake and identification of new  
67 HIV diagnoses were high. These data suggest that opportunities exist to improve ED-HTS which  
68 could enhance identification of undiagnosed HIV.

## 69 **Introduction**

70 There are approximately 38 million people living with HIV (PLHIV) globally, of whom 95%  
71 reside in low-and middle-income countries (LMICs) and 70% in sub-Saharan Africa (1). Although  
72 substantial progress has been made in diagnosing PLHIV, one in eight remain unaware of their  
73 status (2), and the populations of undiagnosed persons is increasing in some sub-Saharan Africa  
74 settings (3), The lack of testing and identification of PLHIV impedes epidemic control, a barrier  
75 which is potentiated by inadequate access to high-risk key populations who have not be well  
76 engaged by conventional approaches such as men, young people, people who inject drugs (PWID),  
77 men who have sex with men (MSM), and sex workers (4-7).

78 Emergency departments (ED) provide unscheduled yet frequent care to patients that may  
79 not otherwise regularly access health services (8-10). In LMICs, episodic emergency care is  
80 particularly common for evaluation and treatment of injuries, which, similar to HIV, has greater  
81 likelihood of occurrence among key populations of men, young people, PWID, MSM and sex  
82 workers (11-15). Additionally, data from sub-Saharan Africa has shown that patients seeking  
83 injury treatments have high burdens of HIV and are often first diagnosed during emergency care  
84 evaluations (16-19). Although research from high-income countries demonstrates that ED patients  
85 are willing to engage in HIV programming (20-22), the delivery of provider-initiated testing and  
86 counseling (PITC) for HIV during emergency care in the sub-Saharan Africa context has been  
87 minimally studied (17, 23).

88 Kenya has a national HIV prevalence of 4.9% among people 15-64 years of age, with one  
89 in five unaware of their HIV disease (24). Although Kenya national guidelines call for universal  
90 PITC at all healthcare interactions implementation has been met with challenges, especially among  
91 key groups (25-27). As such, the Kenya Ministry of Health (MOH) has called for improved

92 approaches for HIV testing services (HTS) in high-incidence populations (28). Concurrently,  
93 Kenya experiences substantial injury burdens which also disproportionately occur in groups highly  
94 affected by HIV(15, 29, 30), indicating that ED-based HIV programming during commonly sought  
95 injury care could be an impactful interface for testing. Given the ED venue potential, this study  
96 aimed to evaluate the delivery and uptake of standard HIV testing by existing services and  
97 personnel among injured persons seeking emergency care in Kenya.

98

## 99 **Methods**

### 100 *Study design, Setting, and Population*

101 This prospective study was completed at Kenyatta National Hospital (KNH), the largest public  
102 health center in the nation of Kenya, located in the capital city of Nairobi. KNH maintains an ED  
103 that provides uninterrupted care access and has specialty services inclusive of surgical providers  
104 for injury treatments. The KNH ED has HTS available 24-hours a day with dedicated clinical space  
105 and staffing by personnel trained in Voluntary Counseling and Testing (VCT) for HIV at all times  
106 tasked with delivering PITC to ED patients. Kenya national guidelines stipulate that universal opt-  
107 out PITC for HIV should be offered at every healthcare encounter, and as such, HTS in the KNH  
108 ED are provided free of charge using Alere Determine™ HIV-1/2 assays. Standardized records  
109 for all patients undergoing HIV testing are maintained using national reporting documentation and  
110 procedures, and any person diagnosed with HIV is provided follow up treatment services at MOH  
111 facility if willing (25).

112 All adult patients ( $\geq 18$  years of age), presenting for injury care to the ED study site were  
113 eligible for participation. Enrollment was carried out between 1 March and 25 May 2021. Patients  
114 known to be pregnant, prisoners of the state and those unable or unwilling to provide informed

115 consent were excluded. Injury designation was based on the standardized triage classification used  
116 in the study setting (30), by clinical staff who were independent of the research personnel. The  
117 study was approved by the KNH ethics and research committee and the institutional review board  
118 of Rhode Island Hospital. Guidelines for Strengthening the Reporting of Observational Studies in  
119 Epidemiology were followed (31).

#### 120 *Data collection and Management*

121 After the provision of informed consent, trained study personnel , who were present in the ED 24-  
122 hours a day during the enrollment phase and independent of the clinical staff, collected  
123 standardized data using digital devices and online databases (32). Consenting participants had  
124 enrollment data collected as close to ED arrival as possible without impeding clinical care.  
125 Baseline data included information on sociodemographic aspects, past medical history,  
126 characteristics of the injury event, previous health behaviors pertaining to HIV testing and  
127 prevention, and use of alcohol and other recreational substances. Participants were followed until  
128 ED disposition (completion of ED care) at which time they had information collection on standard  
129 HIV testing engagement (offering by clinical staff and uptake by the participant). Data on injury  
130 burdens and psychometric data on participant perspectives on ED-based HIV services were also  
131 collected at time of ED disposition. Injury characteristics were classified via the standardized  
132 Abbreviated Injury Scale, as has been used previously in similar settings (33, 34). The  
133 psychometric data utilized a battery of Likert items which were piloted for understandability and  
134 reproducibility in the study setting, and assessed with five-point response scales. The items focused  
135 on appropriateness of ED-HIV testing and specific aspects of physical space, interaction times,  
136 ability to ensure confidentiality and adequacy of patient-provider relationships (Supplement 1).

137 Participants with an ED disposition of admission as inpatients were followed until time of  
138 discharge from the hospital or through 28-days post-enrollment, if they remained hospitalized at  
139 that time. The discharge assessment evaluated inpatient HIV testing engagement (offering by  
140 clinical staff and uptake by the participant). At time of enrollment all participants were asked if  
141 they would be willing to be contacted at 28-days from the index ED visit for phone follow up. If  
142 they assented the participants were contacted at that timepoint (within a five-day window) and had  
143 data collected on interval HIV services engagement. For participants that remained admitted as  
144 inpatients at the 28-day timepoint this assessment was omitted. Participants who died during  
145 facility-based care had data adjudicated from medical documentation when possible.

#### 146 *Assessment of HIV Testing Services*

147 Standard ED-based HIV test offering was assessed at time of disposition based on patient report.  
148 For participants who reported accepting HIV testing, the receipt and outcome of testing was cross-  
149 validated using the MOH national reporting documentation for HTS at the study site. For those  
150 that reported not completing ED testing, the medical documentation was reviewed to evaluate for  
151 any unreported testing encounters. At inpatient discharge, data collection on HIV test offering and  
152 uptake via patient report was cross-checked via the medical documentation and testing registries.  
153 At 28-day follow up participants were evaluated for any interval HIV testing, outcomes and follow  
154 up care since their hospital treatments. As the study evaluated standard HTS delivery and uptake  
155 by existing services and personnel in the study setting, testing services were not offered by study  
156 staff who were independent of the clinical providers

#### 157 *Statistical Analysis*

158 Data analysis was completed using STATA version 16.0 (College Station, USA). The primary  
159 outcome of interest was offering of standard PITC for HIV in the ED setting among the population

160 of injured persons by the existing clinical providers and services. A sample size of 624 participants  
161 was calculated to achieve the primary outcome of identifying the prevalence of ED-based HIV test  
162 offering with a precision of 3.4% (based on one-half the width of the binomial confidence interval)  
163 (35). Secondary outcomes included completion of ED-based PITC, offering and completion of  
164 inpatient HTS and the identification of newly diagnosed PLHIV in the study population.

165 Descriptive analyses were undertaken for the enrolled population using frequencies with  
166 percentages or medians with associated interquartile ranges (IQR) as appropriate. Likert data were  
167 analyzed using medians with IQRs and frequencies represented by response density for individual  
168 items across the outcome scale. Outputs of prevalence with associated 95% confidence intervals  
169 (CI) were calculated for the HIV parameters of interest and stratified for the ED and inpatient care  
170 periods, for the 28-day timepoint and for overall follow up (composite of ED, inpatient and 28-  
171 day assessment). Two participants tested in the ED, and found to have HIV, underwent repeat  
172 testing during inpatient care. For those participants testing outcomes for only the ED testing events  
173 were used in analyses. No participants completing HIV testing at the 28-day follow up time point  
174 were tested during facilities-based care (defined as the composite of ED and inpatient).

175 Participant characteristics base on either ED or facilities-based offering of HIV testing  
176 were compared using Pearson  $X^2$  or Fisher's exact tests for categorical variables and by Mann-  
177 Whitney tests for continuous variables. In the comparative analyses, a statistical correction was  
178 used to set an appropriate significance cut-off ( $p < 0.004$ ) (36). An *a priori* secondary analysis using  
179 multivariable logistic regression to identify factors associated with ED-based as well as facilities-  
180 based offering of HTS was planned, however, the data were insufficient to support those analyses.

181

## 182 **Results**



183 During the enrollment period, 1,282 patients presenting for injury care to the ED setting were  
184 screened for participation. Among those, 73 (5.7%) declined participation and 563 (43.9%) did not  
185 meet inclusion criteria. A total 646 participants were enrolled, of whom 641 had complete data for  
186 the primary outcome (Figure 1). Within the enrolled study population 270 participants (41.8%)  
187 were admitted for inpatient care from the ED, of which 243 had complete inpatient follow up data  
188 (four participants died and 23 were lost to follow-up). Contact assent for 28-day follow up was  
189 provided by 553 participants, and of those, 443 completed data collection.

190

### 191 **Figure 1. Study Population**

192

#### 193 *Characteristics of the Study Population*

194 Within the population there was a male predominance (87.8%). Participant median age was 29  
195 years (IQR: 25, 37 years), with 30.9% being  $\leq 25$  years old. The majority of those enrolled had no  
196 established primary care provider (53.9%) and 6.7% of the participants reported having at least  
197 one chronic medical condition. Alcohol use was reported by 48.6% of the cohort and condom use  
198 during sexual intercourse was reported as never by 51.1% of respondents. Prior HIV testing was  
199 reported by 86.7% participants, with the majority (52.7%) reporting their most recent testing  
200 occurring more than six months prior to enrollment. For those previously tested, 2.3% reported  
201 being PLHIV (Table 1). The reported location for the last HIV testing events was MOH facilities  
202 in 62.3% and private clinics in 27.3%, with 13 participants (2.0%) reporting using HIV self-tests.

203

204 **Table 1. Participant Characteristics**

| Variable   | n (%) or Median (IQR) |
|------------|-----------------------|
| <i>Sex</i> |                       |
| Male       | 567 (87.8%)           |
| Female     | 79 (12.2%)            |

|                                                               |             |
|---------------------------------------------------------------|-------------|
| <i>Age (years)</i>                                            | 29 (25, 37) |
| <i>Employment Status</i>                                      |             |
| Not working                                                   | 116 (18.0%) |
| Laborer                                                       | 323 (50.1%) |
| Self-employed                                                 | 129 (19.9%) |
| Professional                                                  | 78 (12.0%)  |
| <i>Relationship Status</i>                                    |             |
| Single                                                        | 217 (33.6%) |
| Married                                                       | 301 (46.6%) |
| In a relationship                                             | 77 (11.9%)  |
| Divorced / Widowed                                            | 43 (6.7%)   |
| Wishes not to disclose                                        | 4 (0.6%)    |
| Missing / Unknown                                             | 4 (0.6%)    |
| <i>Education</i>                                              |             |
| Completed primary schooling (or less)                         | 252 (39.0%) |
| Completed secondary schooling                                 | 263 (40.7%) |
| Greater than Secondary schooling                              | 131 (20.3%) |
| <i>Reported Chronic Medical Condition</i>                     |             |
| Yes                                                           | 43 (6.7%)   |
| No                                                            | 603 (93.3%) |
| <i>Has Primary Care Provider</i>                              |             |
| Yes                                                           | 297 (46.0%) |
| No                                                            | 348 (53.8%) |
| Missing / Unknown                                             | 1 (0.2%)    |
| <i>Uses Recreational Alcohol</i>                              |             |
| Yes                                                           | 314 (48.6%) |
| No                                                            | 323 (50.0%) |
| Missing / Unknown                                             | 9 (1.4%)    |
| <i>Uses Recreational Substances (non-alcohol)<sup>†</sup></i> |             |
| Yes                                                           | 141 (21.8%) |
| No                                                            | 505 (78.2%) |
| <i>Frequency of Condom use during intercourse</i>             |             |
| Always                                                        | 114 (17.7%) |
| Sometimes                                                     | 142 (21.9%) |
| Never                                                         | 330 (51.1%) |
| Wishes not to disclose                                        | 14 (2.2%)   |
| Missing                                                       | 46 (7.1%)   |
| <i>Previously Tested for HIV</i>                              |             |
| Yes                                                           | 560 (86.7%) |
| No                                                            | 83 (12.8%)  |
| Missing                                                       | 3 (0.5%)    |
| <i>Timing of Last HIV Testing<sup>‡</sup></i>                 |             |
| ≤ 6 months prior                                              | 265 (47.3%) |
| > 6 months prior                                              | 295 (52.7%) |
| <i>Prior HIV Test Results<sup>#</sup></i>                     |             |
| Positive                                                      | 13 (2.3%)   |
| Negative                                                      | 529 (94.5%) |
| Wishes not to disclose                                        | 6 (1.1%)    |
| Missing                                                       | 12 (2.1%)   |

205  
206

<sup>†</sup>, Included substances were classified as depressant, psychogenic or stimulant

<sup>‡</sup>, Denominator = 560, number of participants reporting prior HIV testing

207  
 208 The most common mechanisms of injury were road traffic accidents (51.9%) and falls  
 209 (15.3%). The most frequent anatomical region of injury was craniofacial (51.1%) and lower  
 210 extremities 47.6%. The median duration of ED care was 4.2 hours (IQR: 2.5, 6.0 hours). The  
 211 majority of participants (55.9%) were discharged from the ED and admission for inpatient care  
 212 occurred in 41.8% of cases (Table 2).

213  
 214 **Table 2. Clinical Characteristics and Outcomes**

| Variable                                        | n (%) or Median (IQR) |
|-------------------------------------------------|-----------------------|
| <i>Mechanism of Injury</i>                      |                       |
| Road Traffic Injury                             | 335 (51.9%)           |
| Electrocution                                   | 10 (1.6%)             |
| Fall                                            | 99 (15.3%)            |
| Gun Shot Wound                                  | 2 (0.3%)              |
| Burn                                            | 13 (2.0%)             |
| Stab or Cut                                     | 93 (14.4%)            |
| Intimate partner violence                       | 5 (0.8%)              |
| Other blunt                                     | 43 (6.7%)             |
| Other Penetrating                               | 16 (2.4%)             |
| Missing / Unknown                               | 30 (4.6%)             |
| <i>Transferred from Another Health Facility</i> |                       |
| Yes                                             | 272 (42.1%)           |
| No                                              | 372 (57.6%)           |
| Missing                                         | 2 (0.3%)              |
| <i>Time from Injury to Presentation (hours)</i> | 12.5 (5, 24.5)        |
| <i>Body Region(s) Injured*</i>                  |                       |
| Craniofacial                                    | 328 (51.1%)           |
| Neck                                            | 42 (6.6%)             |
| Thorax                                          | 57 (8.9%)             |
| Abdomen-pelvis                                  | 40 (6.4%)             |
| Cervical Spine                                  | 8 (1.2%)              |
| Thoracic Spine                                  | 2 (0.3%)              |
| Lumbar Spine                                    | 8 (1.3%)              |
| Upper extremity                                 | 237 (37.4%)           |
| Lower extremity                                 | 304 (47.6%)           |
| Genitalia                                       | 5 (0.8%)              |
| <i>Types of Injuries Sustained†</i>             |                       |
| Open wound                                      | 404 (62.5%)           |
| Bruise                                          | 607 (93.9%)           |
| Dislocation                                     | 60 (9.3%)             |
| Fracture Open                                   | 108 (16.7%)           |
| Fracture Closed                                 | 223 (34.5%)           |

|                                           |                |
|-------------------------------------------|----------------|
| Burn                                      | 51(7.9%)       |
| Pneumothorax                              | 4(0.6%)        |
| Hemothorax                                | 2(0.3%)        |
| Vascular Injury                           | 21(3.3%)       |
| Nerve Injury                              | 9(1.4%)        |
| Hemoperitoneum                            | 3(0.4%)        |
| Organ Injury                              | 23(3.5%)       |
| <i>Duration of Emergency Care (hours)</i> | 4.2 (2.5, 6.0) |
| <i>Emergency Department Disposition</i>   |                |
| Discharge                                 | 361(55.9%)     |
| Admitted to Inpatient Service             | 258 (39.9%)    |
| Admitted to Operating Theater             | 12 (1.9%)      |
| Transferred to another facility           | 7 (1.1%)       |
| Left Prior to Care Completion             | 7 (1.1%)       |
| Deceased                                  | 1 (0.1%)       |

215 †, Due to potential for multiple observations per participant sum may exceed 100%

216

217 *HIV Testing Services*

218 Standard ED-based HTS from existing clinical providers were offered to 49 or 8.6% of enrolled  
 219 participants (95% CI: 5.8-9.9%). When offered, HTS in the ED were accepted by 89.8% of  
 220 participants (95% CI: 78.2-95.6%). A new diagnosis of HIV was found in 11.4% of ED-tested  
 221 participants (95% CI: 5.0-24.0%). No participants who were previously known PLHIV completed  
 222 ED-based testing. For the 243 participants admitted from the ED with completed follow up, 14 or  
 223 6.2% were offered testing during inpatient care (95% CI: 3.9-9.9%). Among those offered inpatient  
 224 testing, 93.8% accepted (95% CI: 62.4-99.3%) and 13.3% of those tested were found to have HIV  
 225 (95% CI: 2.9-44.0%). Among the 443 participants with completed 28-day follow up, 22 (5.0%,  
 226 95% CI: 3.3-7.4%) reported completing HIV testing since their index ED encounter. Three of these  
 227 participants (13.0%, 95% CI: 4.0-35.1%) were newly diagnosed with HIV, and all had initiated  
 228 treatment. During the full follow-up period the identified prevalence of HIV in the population  
 229 tested was 10.3% (95% CI: 5.3-19.0%), all being previously undiagnosed PLHIV.

230 In comparative analyses between those offered and not offered ED-HTS no significant  
 231 differences in characteristics were identified (Table 3). In evaluation of factors associated with

232 overall facilities-based HIV test offering, only relationship status was significantly different  
 233 among variables assessed, with those not offered testing more commonly reporting their status as  
 234 single at 34.3% as compared to those offered at 27.5% (p<0.001) (Supplement 2).

235

236 **Table 3. Characteristics Stratified by Emergency Department Offering of HIV Testing Services**

| Variable                                           | HIV Testing Services Offered (n=49) | HIV Testing Services Not Offered (n=592) | P value |
|----------------------------------------------------|-------------------------------------|------------------------------------------|---------|
|                                                    | n (%) or Median (IQR)               | n (%) or Median (IQR)                    |         |
| <i>Sex</i>                                         |                                     |                                          |         |
| Male                                               | 38 (77.6%)                          | 525(88.7%)                               | 0.064   |
| Female                                             | 11 (22.5%)                          | 67(11.3%)                                |         |
| <i>Age (years)</i>                                 |                                     |                                          |         |
| 18-25yrs                                           | 15 (30.6%)                          | 178 (30.1%)                              | 0.578   |
| 26-44yrs                                           | 31 (63.3%)                          | 346 (58.5%)                              |         |
| > 44yrs                                            | 3 (6.1%)                            | 68 (11.5%)                               |         |
| <i>Relationship Status</i>                         |                                     |                                          |         |
| Single                                             | 18 (36.7%)                          | 197 (33.5%)                              | 0.014   |
| Married                                            | 19 (38.8%)                          | 279 (47.4%)                              |         |
| In a relationship                                  | 6 (12.2%)                           | 71 (12.1%)                               |         |
| Divorced / Widowed                                 | 3 (6.1%)                            | 40 (6.8%)                                |         |
| Wishes not to disclose                             | 3 (6.3%)                            | 1(0.2%)                                  |         |
| Missing / Unknown                                  | 0 (0.0%)                            | 1(0.2%)                                  |         |
| <i>Education</i>                                   |                                     |                                          |         |
| Completed primary schooling (or less)              | 26 (53.1%)                          | 223 (37.7%)                              | 0.003   |
| Completed secondary schooling                      | 21 (42.9%)                          | 241 (40.7%)                              |         |
| Greater than Secondary schooling                   | 2 (4.1%)                            | 128 (21.6%)                              |         |
| <i>Has Primary Care Provider</i>                   |                                     |                                          |         |
| Yes                                                | 26 (53.1%)                          | 270 (45.6%)                              | 0.032   |
| No                                                 | 22 (44.9%)                          | 322 (54.4%)                              |         |
| Missing / Unknown                                  | 1 (2.0%)                            | 0 (0.0%)                                 |         |
| <i>Uses Recreational Alcohol</i>                   |                                     |                                          |         |
| Yes                                                | 23 (47.9%)                          | 288 (49.2%)                              | 0.891   |
| No                                                 | 25 (52.1%)                          | 296 (50.6%)                              |         |
| Missing / Unknown                                  | 1 (2.0%)                            | 1 (0.2%)                                 |         |
| <i>Uses Recreational Substances (non-alcohol)†</i> |                                     |                                          |         |
| Yes                                                | 7 (14.3%)                           | 133 (22.5%)                              | 0.183   |
| No                                                 | 42 (85.7%)                          | 459 (77.5%)                              |         |
| <i>Timing of Last HIV Testing</i>                  |                                     |                                          |         |
| ≤ 6 months prior                                   | 22 (44.9%)                          | 241 (40.7%)                              | 0.567   |
| > 6 months prior                                   | 27 (55.1%)                          | 351 (59.3%)                              |         |
| <i>Frequency of Condom use during intercourse</i>  |                                     |                                          |         |
| Always                                             | 6 (12.2%)                           | 107 (18.07%)                             | 0.479   |

|                                                 |             |             |       |
|-------------------------------------------------|-------------|-------------|-------|
| Sometimes                                       | 12 (24.5%)  | 128 (21.6%) |       |
| Never                                           | 24 (49.0%)  | 304 (51.4%) |       |
| Wishes not to disclose                          | 2 (4.1%)    | 12 (2.0%)   |       |
| Missing                                         | 5 (10.2%)   | 41 (6.9%)   |       |
| <i>Number of Body regions injured</i>           | 1 (1, 2)    | 1 (1, 2)    | 0.424 |
| <i>Transferred from Another Health Facility</i> |             |             |       |
| Yes                                             | 13 (26.5%)  | 258 (43.6%) |       |
| No                                              | 36 (73.5%)  | 332 (56.1%) | 0.050 |
| Missing                                         | 0 (0.0%)    | 2(0.3%)     |       |
| <i>Emergency Department Arrival Time</i>        |             |             |       |
| Day (6am – 6pm)                                 | 34 (69.4%)  | 323 (54.5%) |       |
| Night (6pm – 6 am)                              | 15 (30.6%)  | 269 (45.4%) | 0.045 |
| <i>Emergency Department Disposition</i>         |             |             |       |
| Discharge                                       | 28 (57.14%) | 331 (56.0%) |       |
| Admitted to Inpatient Service                   | 19 (38.8%)  | 239 (40.4%) |       |
| Admitted to Operating Theater                   | 1 (2.0%)    | 11 (1.9%)   |       |
| Transferred to another facility                 | 1 (2.0%)    | 5 (0.9%)    | 0.756 |
| Left Prior to Care Completion                   | 0 (0.0%)    | 1 (0.2%)    |       |
| Deceased                                        | 0 (0.0%)    | 0 (0.0%)    |       |

237 †, Included substances were classified as depressant, psychogenic or stimulant

238

### 239 *Perspectives on ED-based HIV care*

240 In Likert item data participants reported high agreement with the need for universal offering of  
 241 ED-based HTS (median=5, IQR: 4,5) and for test offering specifically for patients seeking  
 242 emergent injury care (median=5, IQR: 3,5). Likert item data on the suitability of HIV testing in  
 243 relation to aspects of ED physical space, interaction times, ability to ensure confidentiality and  
 244 adequacy of patient-provider relationships demonstrated that the majority of participants  
 245 responded with the highest level of agreement across all items ( $\geq 60.0\%$ ). There were however  
 246 varying distributions of agreement among a minority of participants for suitability of physical  
 247 space with 11.2% indicating the lowest level of agreement. Also, for adequacy of confidentiality  
 248 and patient-provider relationships lower levels of agreement were reported by 12.4% and 10.1%  
 249 of participants, respectively (Figure 2).

250

### 251 **Figure 2. Patient Perspectives on Emergency Department HIV Testing**

252

253 **Discussion**

254 This study contributes to the developing literature on HTS in ED settings, and represents some of  
255 the first prospective data with longitudinal assessment of persons presenting for care of injuries in  
256 sub-Saharan Africa (17, 23). The results demonstrate that there exists substantial potential to  
257 increase HTS for those seeking emergency care of injuries, and that the population had frequent  
258 uptake of testing when it was offered in the study setting. Given these findings, in conjunction  
259 with the relatively high frequency of newly identified PLHIV among those completing testing,  
260 development of improved ED-based HIV-programming may represent an impactful approach to  
261 enhance testing and identification of undiagnosed individuals from high-incidence populations.

262 In the current data standard ED-based PITC for HIV by existing clinical providers was  
263 infrequently offered to those seeking care. This is congruent with the limited data that exists from  
264 other emergency care settings in sub-Saharan Africa (17, 18). In a 2018 cohort from South Africa,  
265 in which the majority of patients were men and seeking emergency injury treatments, only 25% of  
266 patients were offered testing (18). Given that Kenya national guidelines call for universal opt-out  
267 PITC at every healthcare encounter (25), the low occurrence of test offering in the studied  
268 population indicates that there is potential to increase testing delivery from the ED setting.  
269 Furthermore, as emergency care interactions in LMICs are common, with a median of 30,000 visits  
270 per facility per year (9), opportunities may exist to augment HTS to large numbers of persons from  
271 LMIC ED venues. As injuries are one of the most frequent reasons for receiving emergency care,  
272 and those most likely to be injured are also key target populations for testing initiatives the ED  
273 venue may be an even more important focus point to improve HIV service delivery (6, 11-14). In  
274 Kenya specifically, younger people, who are more frequently injured and also comprise more than

275 half of all new HIV infections are also less likely to test, which inhibits success of HIV control  
276 programs and further points to the potential impacts of accessing this group via ED-based HIV  
277 care (27, 28). In light of the unique systems, environmental and human aspects inherent in  
278 emergency care, coupled to the observed infrequent offering of HIV testing by the existing services  
279 in the current data, and prior studies (17, 18), research to better understand approaches for  
280 improved ED-HTS in Kenya and broader sub-Saharan Africa settings are needed.

281         When offered, acceptance of HIV testing in the population was high, both in the ED and  
282 inpatient care venues. Furthermore, the majority of participants strongly agreed that HTS should  
283 be provided during emergency care and that aspects of the environment and care interactions are  
284 suitable for ED-based testing. These data affirm similar findings from previous studies reporting  
285 frequent acceptance of HIV testing in emergency and acute care populations in sub-Saharan Africa  
286 when testing is offered (18, 19, 26). This suggests that the challenges to ED-based HTS delivery  
287 may be driven with a greater relative predominance by systems and provider factors rather than  
288 those of the patient recipients. However, due to the complex elements surrounding HIV testing  
289 during emergency care, future studies to yield more comprehensive data on opportunities and  
290 challenges in ED-based HIV care are needed to inform development of appropriate and effective  
291 implementation approaches for service enhancement.

292         The proportion of newly identified PLHIV among participants completing testing was  
293 more than two-fold greater than the baseline population prevalence in the study setting (24). These  
294 data comport with prior studies in which HIV burdens among persons with injuries in Africa have  
295 been found to be greater than the prevalence in the corresponding populations (16), and that ED-  
296 based testing frequently identifies incident infections (18, 19, 37). As the current data pertaining  
297 to testing outcomes were limited, secondary to the low numbers of test offered, precise estimates



298 on HIV burdens in the population studied are difficult to make and larger sampling frames are  
299 required. However, the high observed disease burden does support the potential to increase  
300 identification of PLHIV through engagement and testing in ED settings. Although gains in  
301 combating the HIV epidemic require care coordination and treatment following diagnosis (38),  
302 identification of PLHIV is a requisite first step, which could be advanced towards with  
303 strengthened ED-HTS in sub-Saharan Africa, an approach which has been recognized as important  
304 in alternative higher-resourced settings (39).

305 The majority of injury care globally is completed during emergency/acute care encounters  
306 and does not require inpatient management (15, 40). This was observed in the current study  
307 population, however a substantial minority of participants did require admission. Among the  
308 admitted participants, the data on HIV testing was similar to the ED venue, with testing being  
309 infrequently offered but when offered commonly accepted. This may indicate that challenges to  
310 HIV testing among injured persons is not isolated only to the emergent care period specifically in  
311 the ED setting, and better understanding of how to address these challenges throughout the  
312 continuum of treatment to enhance HTS would be instructive in future program development.

### 313 *Limitations*

314 This study must be interpreted with consideration of certain limitations. Even though  
315 prospective methods were used there was a small amount of missing data for the primary outcome  
316 on ED-based HIV testing. As the amount of missingness was minimal, this is unlikely to have  
317 significantly impacted the findings. However, there was a larger degree of missing data for  
318 inpatient and 28-day follow up assessments, such that outcomes for those time-points may be less  
319 certain. The inclusion criteria requiring participant consent without the option for consent by an  
320 alternative proxy may have introduced selection bias as those with persistent clinical instability or

321 altered mental status were excluded. Although this could affect the generalizability, the internal  
322 validity of the results to the population of interest would not be impacted. As well, the data may  
323 not be completely generalizable to alternative settings as they are derived from a clinical site that  
324 is relatively well-resourced for the provision of HIV testing and further study is needed to  
325 characterize HIV services in settings with differential resources. Related, although an *a priori*  
326 secondary objective was to assess factors associated with the standard offering of HIV testing in  
327 the population the low event rate for test offering precluded the ability to complete those analyses.  
328 As such, future research aiming to assess opportunities and challenges associated with ED-based  
329 HIV testing in high-burden settings, such as Kenya, will be beneficial to inform programming.  
330 Finally, the study was completed during the pandemic caused by SARS CoV-2 and it is reasonable  
331 that transmission concerns could have reduced the delivery of HTS in the study setting as has been  
332 observed in other research (41). The study is however valid within the context in which it was  
333 completed, and as pandemic conditions are likely to persist, particularly in LMICs where HIV  
334 burdens have the greatest impacts (1, 42), the results provide relevant data to inform HTS in the  
335 contemporary global context.

336

## 337 **CONCLUSIONS**

338 This prospective longitudinal data found that the offering and delivery of ED-based HTS to the  
339 population of adult injured persons seeking care was low, but when offered, there was frequent  
340 uptake and a high relative identification of newly diagnosed PLHIV as compared the prevalence  
341 in the general population. These findings suggest that there are opportunities to increase ED-HTS  
342 delivery, and that if achieved, this could enhance identification of undiagnosed persons during  
343 emergency care encounters. Given the potential margin for gains in HIV testing and diagnosis,

344 coupled to the limited available research from LMIC emergency care settings, future studies to  
345 better understand of opportunities and challenges in ED-based HIV programming are needed to  
346 inform development of more effective and context appropriate testing strategies.

347

348 **Acknowledgments:** The authors thank all of the personnel who assisted in the research and study  
349 participants who took part in the work. As well, acknowledgment to Ananya Suram who  
350 contributed to production of data graphics.

## 351 REFERENCES

- 352 1. Confronting Inequalities - Lessons for pandemic responses from 40 years of AIDS. 2021.  
353 Accessed at: [https://www.unaids.org/sites/default/files/media\\_asset/2021-global-aids-](https://www.unaids.org/sites/default/files/media_asset/2021-global-aids-update_en.pdf)  
354 [update\\_en.pdf](https://www.unaids.org/sites/default/files/media_asset/2021-global-aids-update_en.pdf) [press release].
- 355 2. Global AIDS Update. Seizing the Moment: Tackling entrenched inequalities to end  
356 epidemics. UNAIDS; 2020. Accessed at:  
357 [https://www.unaids.org/sites/default/files/media\\_asset/2020\\_global-aids-report\\_en.pdf](https://www.unaids.org/sites/default/files/media_asset/2020_global-aids-report_en.pdf).
- 358 3. Vandormael A, de Oliveira T, Tanser F, Barnighausen T, Herbeck JT. High percentage of  
359 undiagnosed HIV cases within a hyperendemic South African community: a population-based  
360 study. *J Epidemiol Community Health*. 2018;72(2):168-72.
- 361 4. UNAIDS. Blind spot: addressing a blind spot in the response to HIV. Reaching out to  
362 men and boys. 2017. Accessed at:  
363 [https://www.unaids.org/sites/default/files/media\\_asset/blind\\_spot\\_en.pdf](https://www.unaids.org/sites/default/files/media_asset/blind_spot_en.pdf).
- 364 5. Shand T, Thomson-de Boor H, van den Berg W, Peacock D, Pascoe L. The HIV blind  
365 spot: men and HIV testing, treatment and care in sub-Saharan Africa. *IDS Bull* 2014; 1:53–60.
- 366 6. Consolidated Guidelines on HIV Prevention, Diagnosis, Treatment and Care for Key  
367 Populations – 2016 Update. Geneva: World Health Organization; 2016. DEFINITIONS OF KEY  
368 TERMS. Available from: <https://www.ncbi.nlm.nih.gov/books/NBK379697/#>.
- 369 7. Sandfort TGM, Dominguez K, Kayange N, Ogendo A, Panchia R, Chen YQ, et al. HIV  
370 testing and the HIV care continuum among sub-Saharan African men who have sex with men  
371 and transgender women screened for participation in HPTN 075. *PLoS One*.  
372 2019;14(5):e0217501.
- 373 8. Hodkinson PW, Wallis LA. Emergency medicine in the developing world: a Delphi  
374 study. *Acad Emerg Med*. 2010;17(7):765-74.
- 375 9. Obermeyer Z, Abujaber S, Makar M, Stoll S, Kayden SR, Wallis LA, et al. Emergency  
376 care in 59 low- and middle-income countries: a systematic review. *Bull World Health Organ*.  
377 2015;93(8):577-86G.
- 378 10. Tang N, Stein J, Hsia RY, Maselli JH, Gonzales R. Trends and characteristics of US  
379 emergency department visits, 1997-2007. *JAMA*. 2010;304(6):664-70.
- 380 11. Disease GBD, Injury I, Prevalence C. Global, regional, and national incidence,  
381 prevalence, and years lived with disability for 354 diseases and injuries for 195 countries and  
382 territories, 1990-2017: a systematic analysis for the Global Burden of Disease Study 2017.  
383 *Lancet*. 2018;392(10159):1789-858.
- 384 12. World Health Organization. Injuries and violence: the facts 2014. Accessed at:  
385 [http://apps.who.int/iris/bitstream/10665/149798/1/9789241508018\\_eng.pdf?ua=1&ua=1&ua=1](http://apps.who.int/iris/bitstream/10665/149798/1/9789241508018_eng.pdf?ua=1&ua=1&ua=1).
- 386 13. Aluisio AR, Palaniappan A, Farquhar C, Mello MJ. Integrated HIV-injury programming:  
387 an underutilized intersection to engage young adults in HIV care in low and middle-income  
388 countries. *AIDS*. 2018;32(10):1377-9.
- 389 14. Deering KN, Amin A, Shoveller J, Nesbitt A, Garcia-Moreno C, Duff P, et al. A  
390 systematic review of the correlates of violence against sex workers. *Am J Public Health*.  
391 2014;104(5):e42-54.
- 392 15. Haagsma JA, Graetz N, Bolliger I, Naghavi M, Higashi H, Mullany EC, et al. The global  
393 burden of injury: incidence, mortality, disability-adjusted life years and time trends from the  
394 Global Burden of Disease study 2013. *Inj Prev*. 2016;22(1):3-18.

- 395 16. Aluisio AR, Rege S, Stewart BT, Kinuthia J, Levine AC, Mello MJ, et al. Prevalence of  
396 HIV-Seropositivity and Associated Impact on Mortality among Injured Patients from Low-and  
397 Middle-Income Countries: A Systematic Review and Meta-Analysis. *Curr HIV Res.*  
398 2017;15(5):307-17.
- 399 17. Hansoti B, Kelen GD, Quinn TC, Whalen MM, DesRosiers TT, Reynolds SJ, et al. A  
400 systematic review of emergency department based HIV testing and linkage to care initiatives in  
401 low resource settings. *PLoS One.* 2017;12(11):e0187443.
- 402 18. Hansoti B, Stead D, Parrish A, Reynolds SJ, Redd AD, Whalen MM, et al. HIV testing in  
403 a South African Emergency Department: A missed opportunity. *PLoS One.*  
404 2018;13(3):e0193858.
- 405 19. Waxman MJ, Kimaiyo S, Ongaro N, Wools-Kaloustian KK, Flanigan TP, Carter EJ.  
406 Initial outcomes of an emergency department rapid HIV testing program in western Kenya.  
407 *AIDS Patient Care STDS.* 2007;21(12):981-6.
- 408 20. Rothman RE, Ketlogetswe KS, Dolan T, Wyer PC, Kelen GD. Preventive care in the  
409 emergency department: should emergency departments conduct routine HIV screening? a  
410 systematic review. *Acad Emerg Med.* 2003;10(3):278-85.
- 411 21. Reichmann WM, Walensky RP, Case A, Novais A, Arbelaez C, Katz JN, et al.  
412 Estimation of the prevalence of undiagnosed and diagnosed HIV in an urban emergency  
413 department. *PLoS One.* 2011;6(11):e27701.
- 414 22. White DAE, Giordano TP, Pasalar S, Jacobson KR, Glick NR, Sha BE, et al. Acute HIV  
415 Discovered During Routine HIV Screening With HIV Antigen-Antibody Combination Tests in 9  
416 US Emergency Departments. *Ann Emerg Med.* 2018;72(1):29-40 e2.
- 417 23. Aluisio AR, Lim RK, Tang OY, Sugut J, Kinuthia J, Bosire R, et al. Acceptability and  
418 uptake of HIV self-testing in emergency care settings: A systematic review and meta-analysis.  
419 *Acad Emerg Med.* 2021.
- 420 24. National AIDS and STI Control Programme (NASCOP), Preliminary KENPHIA 2018  
421 Report. Nairobi: NASCOP; 2020. Accessed at: [https://phia.icap.columbia.edu/wp-](https://phia.icap.columbia.edu/wp-content/uploads/2020/04/KENPHIA-2018_Preliminary-Report_final-web.pdf)  
422 [content/uploads/2020/04/KENPHIA-2018\\_Preliminary-Report\\_final-web.pdf](https://phia.icap.columbia.edu/wp-content/uploads/2020/04/KENPHIA-2018_Preliminary-Report_final-web.pdf).
- 423 25. National AIDS and STI Control Programme, Ministry of Health, Kenya. Guidelines for  
424 HIV Testing Services in Kenya. Nairobi: NASCOP; 2015. Accessed at: [https://www.fast-](https://www.fast-trackcities.org/sites/default/files/Kenya%20HIV%20Testing%20Services%20Guidelines%20%282015%29.pdf)  
425 [trackcities.org/sites/default/files/Kenya%20HIV%20Testing%20Services%20Guidelines%20%282015%29.pdf](https://www.fast-trackcities.org/sites/default/files/Kenya%20HIV%20Testing%20Services%20Guidelines%20%282015%29.pdf).
- 426 26. Agutu CA, Oduor TH, Kombo BK, Mugo PM, Chira SM, Ogada FW, et al. High patient  
427 acceptability but low coverage of provider-initiated HIV testing among adult outpatients with  
428 symptoms of acute infectious illness in coastal Kenya. *PLoS One.* 2021;16(2):e0246444.
- 429 27. Kenyan Ministry of Health/National AIDS Control Council. Kenya AIDS Response  
430 Progress Report 2016. Accessed at: [http://nacc.or.ke/wp-content/uploads/2016/11/Kenya-AIDS-](http://nacc.or.ke/wp-content/uploads/2016/11/Kenya-AIDS-Progress-Report_web.pdf)  
431 [Progress-Report\\_web.pdf](http://nacc.or.ke/wp-content/uploads/2016/11/Kenya-AIDS-Progress-Report_web.pdf).
- 432 28. National AIDS and STI Control Programme, Ministry of Health, Kenya. HIV self-testing:  
433 operational manual for the delivery of HIVST services in Kenya. 2017. Accessed at:  
434 <https://livinggoods.org/wp-content/uploads/2019/06/HIV-Self-Testing-Manual.pdf>.
- 435 29. Botchey IM, Jr., Hung YW, Bachani AM, Paruk F, Mehmood A, Saidi H, et al.  
436 Epidemiology and outcomes of injuries in Kenya: A multisite surveillance study. *Surgery.*  
437 2017;162(6S):S45-S53.
- 438

- 439 30. Wangara AA, Hunold KM, Leeper S, Ndiawo F, Mweu J, Harty S, et al. Implementation  
440 and performance of the South African Triage Scale at Kenyatta National Hospital in Nairobi,  
441 Kenya. *Int J Emerg Med*. 2019;12(1):5.
- 442 31. von Elm E, Altman DG, Egger M, Pocock SJ, Gotsche PC, Vandenbroucke JP, et al.  
443 The Strengthening the Reporting of Observational Studies in Epidemiology (STROBE)  
444 statement: guidelines for reporting observational studies. *Lancet*. 2007;370(9596):1453-7.
- 445 32. Harris PA, Taylor R, Thielke R, Payne J, Gonzalez N, Conde JG. Research electronic  
446 data capture (REDCap)--a metadata-driven methodology and workflow process for providing  
447 translational research informatics support. *J Biomed Inform*. 2009;42(2):377-81.
- 448 33. Kobusingye OC, Lett RR. Hospital-based trauma registries in Uganda. *J Trauma*.  
449 2000;48(3):498-502.
- 450 34. Tang OY, Marques CG, Ndebwanimana V, Uwamahoro C, Uwamahoro D, Lipsman ZW,  
451 et al. Performance of Prognostication Scores for Mortality in Injured Patients in Rwanda. *West J*  
452 *Emerg Med*. 2021;22(2):435-44.
- 453 35. Daniel WW, editor. 7th ed. New York: John Wiley & Sons; 1999. *Biostatistics: a*  
454 *foundation for analysis in the health sciences*.
- 455 36. Streiner DL. Best (but oft-forgotten) practices: the multiple problems of multiplicity-  
456 whether and how to correct for many statistical tests. *Am J Clin Nutr*. 2015;102(4):721-8.
- 457 37. Pintye J, Ortblad KF, Mawandia S, Bakae O, Tau L, Grande M, et al. Frequent Detection  
458 of Undiagnosed HIV Within Emergency Departments in Botswana. *Sex Transm Dis*.  
459 2021;48(7):e97-e100.
- 460 38. Hull MW, Montaner JS. HIV treatment as prevention: the key to an AIDS-free  
461 generation. *J Food Drug Anal*. 2013;21(4):S95-S101.
- 462 39. Rothman RE. Current Centers for Disease Control and Prevention guidelines for HIV  
463 counseling, testing, and referral: critical role of and a call to action for emergency physicians.  
464 *Ann Emerg Med*. 2004;44(1):31-42.
- 465 40. DiMaggio CJ, Avraham JB, Lee DC, Frangos SG, Wall SP. The Epidemiology of  
466 Emergency Department Trauma Discharges in the United States. *Acad Emerg Med*.  
467 2017;24(10):1244-56.
- 468 41. Stanford KA, Friedman EE, Schmitt J, Spiegel T, Ridgway JP, Moore M, et al. Routine  
469 Screening for HIV in an Urban Emergency Department During the COVID-19 Pandemic. *AIDS*  
470 *Behav*. 2020;24(10):2757-9.
- 471 42. Salyer SJ, Maeda J, Sembuche S, Kebede Y, Tshangela A, Moussif M, et al. The first and  
472 second waves of the COVID-19 pandemic in Africa: a cross-sectional study. *Lancet*.  
473 2021;397(10281):1265-75.
- 474

| Likert Item<br>Topical Focus*                               | n   | Median<br>(IQR) | Response Frequency n (%)   |                       |                       |                    |                         | Density<br>Scale                                                                                                 |
|-------------------------------------------------------------|-----|-----------------|----------------------------|-----------------------|-----------------------|--------------------|-------------------------|------------------------------------------------------------------------------------------------------------------|
|                                                             |     |                 | 1 (Do not<br>agree at all) | 2 (Agree<br>a little) | 3 (Agree<br>somewhat) | 4 (Agree<br>a lot) | 5 (Agree<br>completely) |                                                                                                                  |
| Testing should be offered for all patients                  | 629 | 5 (4, 5)        | 50<br>(8.0%)               | 48<br>(7.6%)          | 46<br>(7.3%)          | 64<br>(10.2%)      | 421<br>(66.9%)          | 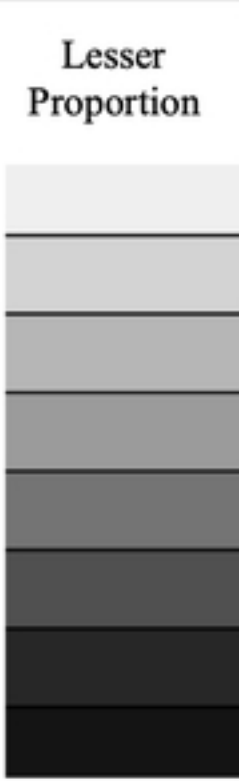 <p>Lesser<br/>Proportion</p> |
| Testing should be offered for injured patients specifically | 639 | 5 (3, 5)        | 42<br>(6.6%)               | 45<br>(7.0%)          | 80<br>(12.5%)         | 51<br>(8.0%)       | 421<br>(65.9%)          |                                                                                                                  |
| The physical space and room are acceptable for testing      | 571 | 5 (3, 5)        | 64<br>(11.2%)              | 52<br>(9.1%)          | 67<br>(11.7%)         | 36<br>(6.3%)       | 352<br>(61.7%)          |                                                                                                                  |
| Confidentiality and trust are sufficient for testing        | 575 | 5 (3, 5)        | 42<br>(7.3%)               | 71<br>(12.4%)         | 79<br>(13.7%)         | 38<br>(6.6%)       | 345<br>(60.0%)          |                                                                                                                  |
| Patient-provider relationships are adequate for testing     | 591 | 5 (3, 5)        | 16<br>(2.7%)               | 60<br>(10.1%)         | 99<br>(16.8%)         | 53<br>(9.0%)       | 363<br>(61.4%)          |                                                                                                                  |
| The treatment time a patient has is enough for testing      | 626 | 5 (4, 5)        | 8<br>(1.3%)                | 21<br>(3.4%)          | 83<br>(13.2%)         | 52<br>(8.3%)       | 462<br>(73.8%)          |                                                                                                                  |
|                                                             |     |                 |                            |                       |                       |                    |                         |                                                                                                                  |

\* Full text Likert items provided in Supplement 1

Figure 2



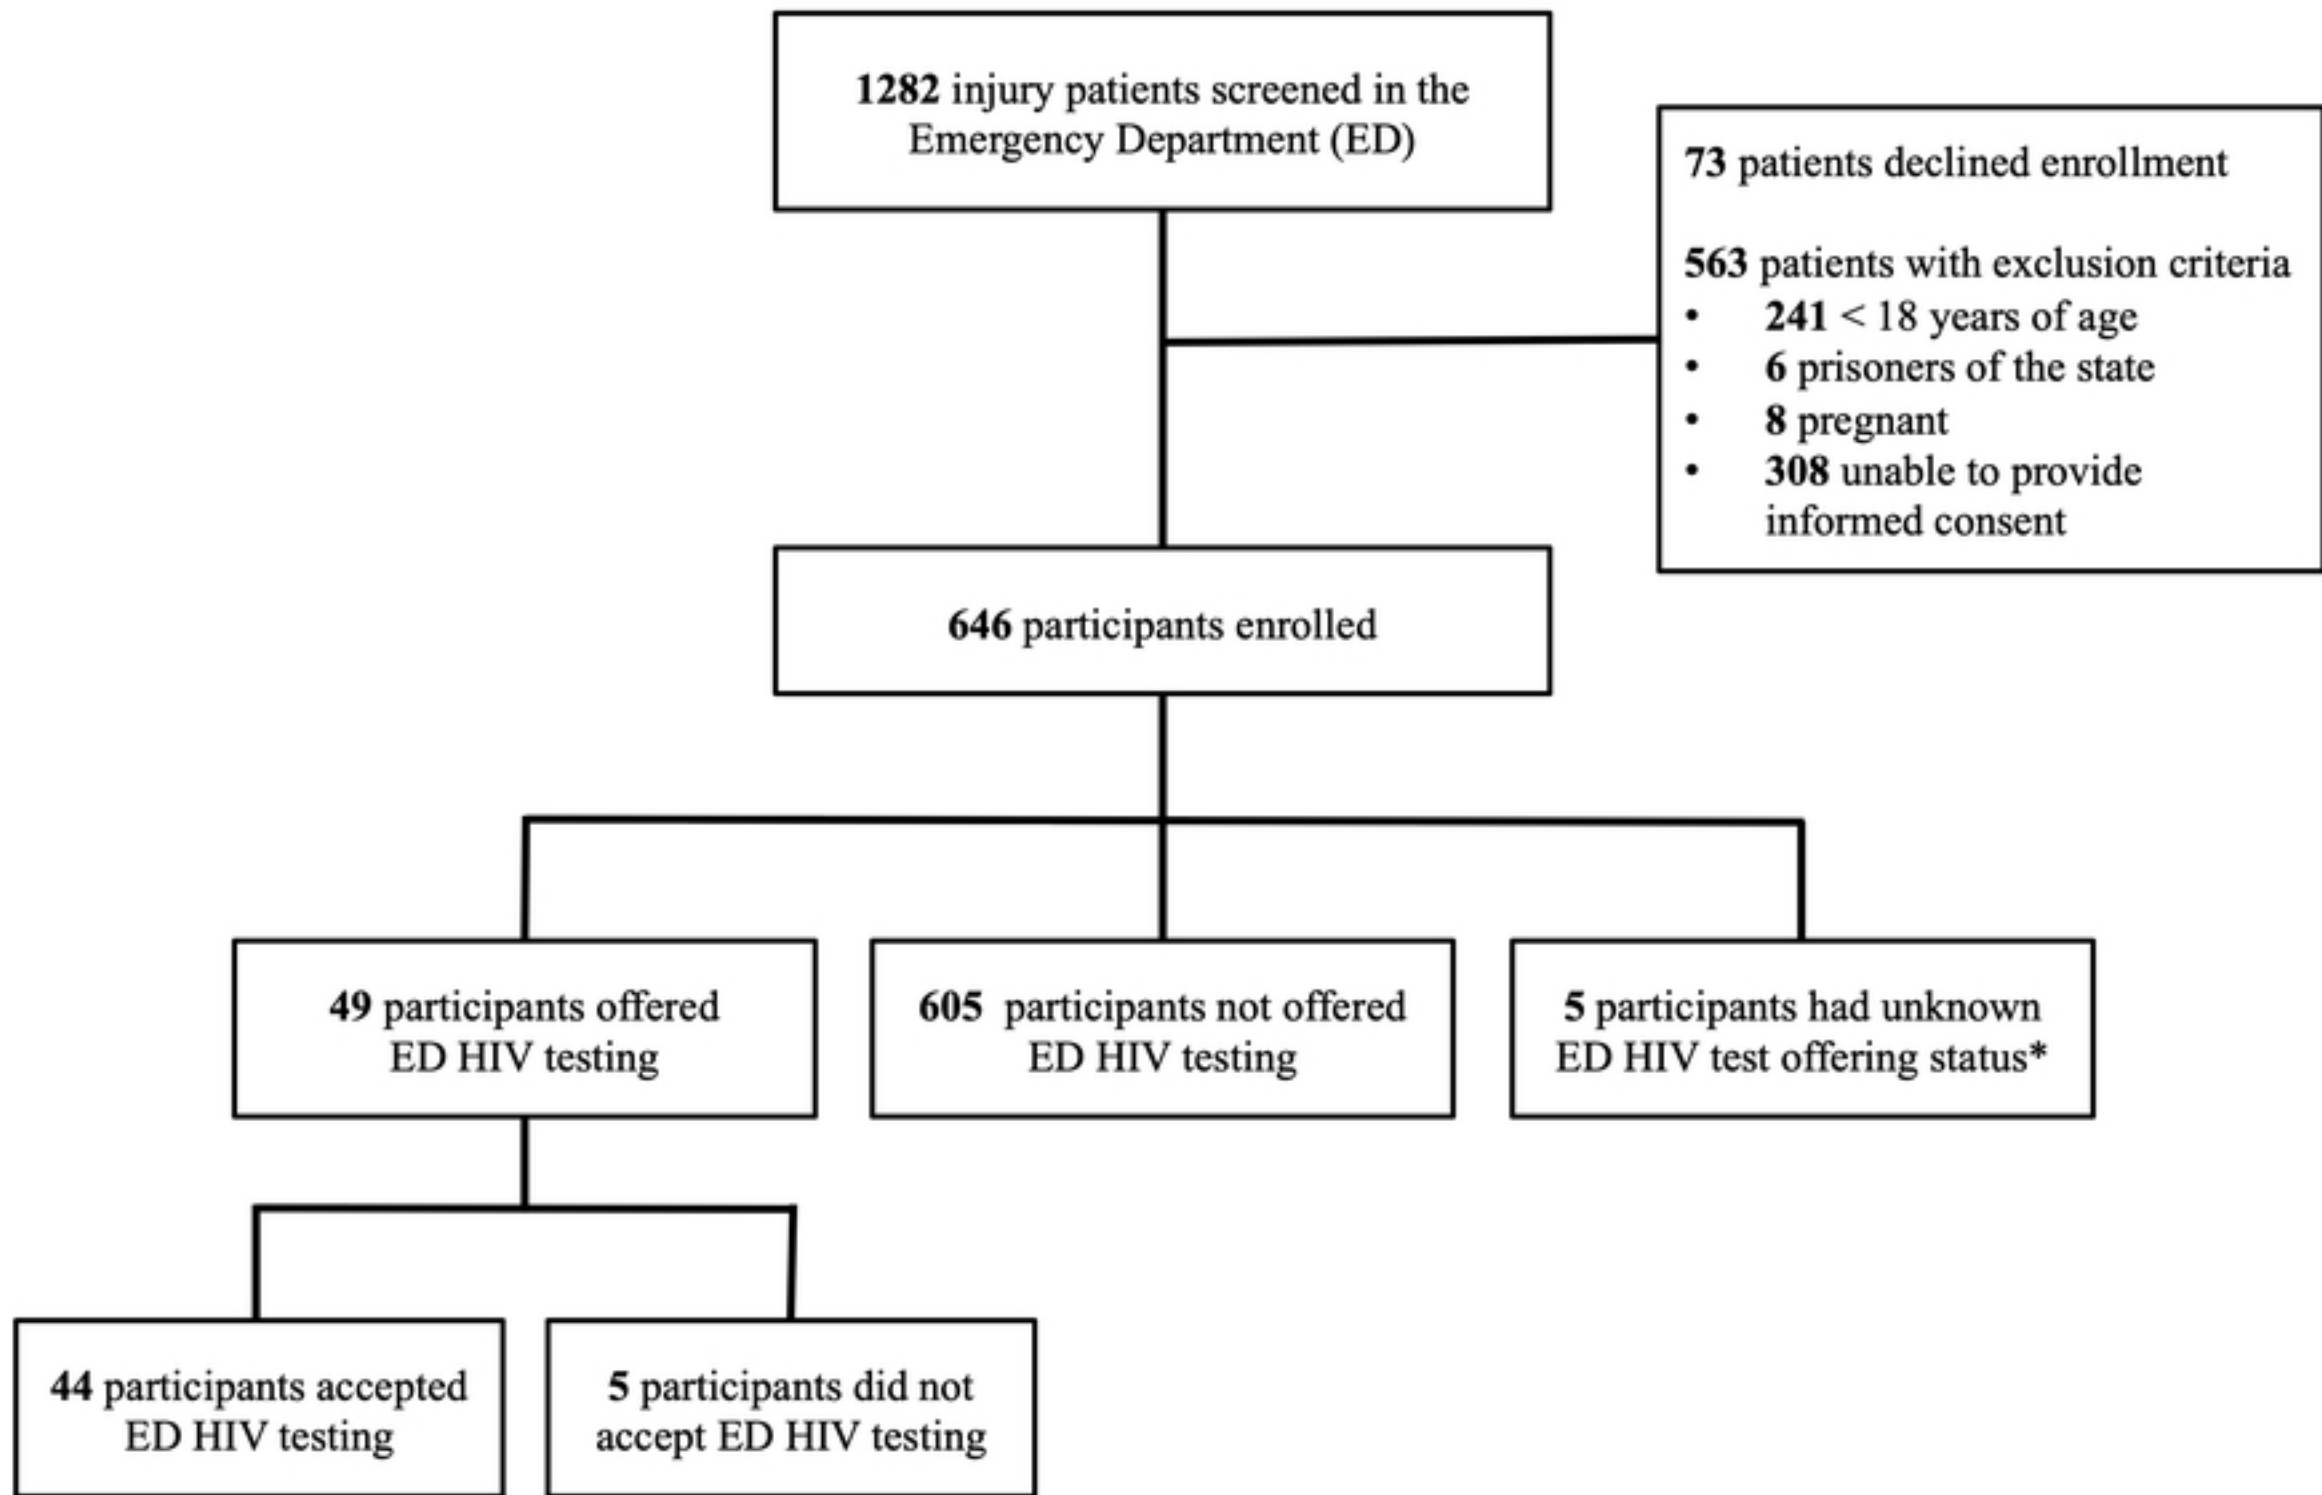

\*1 participant died during ED care, 2 participants lost to follow-up from the ED and 2 participants with missing data on HIV test offering evaluation

Figure 1
